# Supplementary material for: Whole-exome sequencing combined with functional genomics reveals novel candidate driver cancer genes in endometrial cancer
Source: HighWire-hosted journal article supplement (doi:10.1101/gr.137596.112), 2012-10-01
Supplement: TableS5.xlsx [file TableS5.xlsx]

## Sheet: Sheet1
Sample ID	Histology	PTEN	PIK3CA	PIK3R1	PIK3R2	AKT1	CTNNB1	TP53	ARID1A
E1	Endometrioid 3	R233STP, Het	E542K
E10	Endometrioid 3	P95L, Het		R465_E469del>K; Y657fs*6			S37F, Hetero
E100	Endometrioid 3	E18STP, Het							P1560fs*5
E101	Endometrioid 2
E102	Mixed-Endo/CC	R130G, Het	E545K (Hetero)					R248W, Hetero
E103	Endometrioid 2		Q546R						E1075*
E104	Endometrioid 2
E106	Mixed-Endo/CC
E107	Endometrioid 1		G118D (Hetero)						Q1098*
E108	Endometrioid 2	P204fs*17, het	H1047R/L (Hetero)						S1558fs*11; P1560_1561delfs*9
E109	Mixed-Endo/Serous
E11	Endometrioid 2
E110	Endometrioid 2	F215fs*6, het; R130G, Het		E596fs*66, het; I571fs*31
E111	Endometrioid 2	Y27N, Het; R130G, Het	E542K						G2087*
E112	Endometrioid 2
E113	Mixed-Endo/CC/serous	R173C, Het; D92E, Het; F154L, Het	R88Q (Hetero)	R348*, Het					R1989*
E114	Endometrioid 2		C420R					H193R, Homo
E115	Endometrioid 2			K575fs*23; K382fs*14; K382fs*14
E116	Endometrioid 2	R173L, Het; W111STP, Het		H450del, het
E117	Endometrioid 2	Y16fs*28, het		Y467_T471del>S; N410fs*8					Q601*
E118	Endometrioid 1	K13T, Het; F341C, Het	R93W (Hetero)E453K	R503W, Het				R213STP, Hetero
E119	Mixed-Endo/CC/serous		R38S (Hetero)	D578fs*23, het; D578fs*23, het					R2233W; G285fs*78
E12	Endometrioid 2
E120	Endometrioid 2
E121	Endometrioid 2
E122	Endometrioid 2			D578fs*23, het					I1117delfs*43
E123	Endometrioid 2	C71fs*28, het; A328fs*16, het		R503fs*8; L30F, Het; Q552>KQ			S37F, Hetero		S698fs*118
E124	Endometrioid 2	F341V, Het; R130P, Het	R88Q (Hetero)D350G (Hetero)	E217K, Het; R348STP, Het
E125	Endometrioid 2	K267fs*9, het; F241S, Het	E39K (Hetero)				S37F		Q480*
E126	Endometrioid 3
E127	Endometrioid 2	S294fs*13, het; G129R, Het	H1047Y (Hetero)		G373R, Hetero				D1850fs*33
E129	Endometrioid 2
E13	Endometrioid 2	R308fs*10, homo					D32Y	L145R, Homo
E130	Serous		E545K (Hetero)						G89R
E131	Endometrioid 2	K267fs*9, het							W1498*
E132	Mixed-Endo/CC								W1498*
E134	Mixed 3	N48del, Het; N49S, Homo	E545K (Hetero)		R35Q, Hetero		SNP (T41A, Hetero+)		G276fs*87
E135	Mixed-Endo/CC	N323fs*2, het; V166fs*14, het	K944fs (Hetero)C407Y (Hetero), V344M (Hetero), D350G (Hetero)						G1375D
E136	clear cell								G276fs*87
E137	Mixed-Endo/Serous			R574del				A189T, hetero	W1498*; A1419V
E138	Endometrioid 2
E139	Endometrioid 1	F341C, Het					S37F
E14	Endometrioid 2
E141	Mixed-CC/Serous		L339I (Hetero)
E142	Endometrioid 2
E143	Mixed-Endo/Serous		H1047R/L (Hetero)					G279E, Hetero
E144	Endometrioid 2	R130Q, Het	E542V
E145	Endometrioid 2			I442_Y452del					WGAA337del
E146	Endometrioid 2	R130G, Het
E147	Endometrioid 2	E314STP, Homo					G34E		G2087E
E148	Endometrioid 2
E149	Mixed-Endo/Serous
E15	Endometrioid 2	K267fs*9, het; N323fs*2, het	Q546K (Hetero)						D1850fs*33; M1564fs*1
E150	Endometrioid 3	V170fs*13, het	Q546R					E258STP, Hetero
E151	Endometrioid 2			Q579fs*3; L581fs*2					Q944*
E152	Endometrioid 2	Q171R, Het		K567E, Het					Q561H; K1072fs*21
E153	Endometrioid 2	R233STP, Het; R335STP, Het	H1047R/L (Hetero)
E154	Endometrioid 2	E201STP, Het	E453del (Hetero)						D1850fs*33
E155	Endometrioid 2							M246R, Hetero
E156	Endometrioid 2	L318fs*2, het							S301*
E157	Mixed-Endo/Serous
E158	clear cell								S1465F
E159	Endometrioid 3	K267fs*9, het	H1047R/L (Homo);H701P	E297K, Het					N1784fs*5
E16	Endometrioid 2	L247fs*3, het; C124S, Het
E160	Endometrioid 2	G251V, Homo	K884R (Hetero)				S37F
E161	Endometrioid 2			E451_Y452del			S37C		Y2031*
E162	Endometrioid 2	R130G, Het; S10del, het					SNP (S45F, Hetero+)		S772fs*67
E163	Endometrioid 2	R130Q, Het	E542K		N403I, Hetero				Q581*
E164	Endometrioid 3			RD577del					A1439V; Q372fs*19
E165	Endometrioid 3	E299STP, Het							S1992*
E166	Endometrioid 2	K267fs*9, het					S37F
E167	Endometrioid 2	R130G, Het		H450del					Q766fs*67
E168	Endometrioid 2
E169	Mixed-Endo/CC	T366fs*44							V2041fs*58; P224fs*8
E17	Endometrioid 2
E170	Endometrioid 2		R88Q (Hetero)				S37F, Hetero	A189T	S1465F, het; E2115*, het
E171	Endometrioid 2				A171V, Hetero
E172	Endometrioid 2		H1047R/L (Homo)				SNP (S33C, Homo_)
E173	Endometrioid 3	R130G, Het	E110K						P1326fs*155
E174	Mixed-Endo/CC
E175	Endometrioid 2	N329fs*14, het	R38S (Hetero)		K376N, Hetero		S37F, Hetero
E176	Endometrioid 3	E299STP, Het		R642STP, Het; R348STP, Het					R1879Q
E177	Endometrioid 3	V85G, Het						R248W, Homo
E178	Endometrioid 2	Y336STP, Het	E453del (Hetero)	E439del					K1072fs*21
E179	Endometrioid 1	Y336STP, Het	R88Q (Hetero)						R1989*
E18	Endometrioid 3	R130G, Het	R88Q						Q488*
E180	Endometrioid 2	N323fs*2, het; E91*, Het		K142fs*35			SNP (T41I, Hetero+)		D1850fs*33
E181	Endometrioid 2								L2016fs*14; L2073fs*25
E182	Mixed-Endo/Serous			I338V, Het
E184	Endometrioid 2	Y188D, Het; Y65D, Het; F341V, Het	R357Q (Hetero)	R461STP, Het; E468STP, Het; R348STP, Het				A189T, Hetero
E185	Endometrioid 2	R130Q, Het		D605fs*8, het	A415T, Hetero		SNP (G34R, Hetero+)		D972fs*3
E186	Endometrioid 2			K382del; L380_I381del>F				C135W, Hetero
E187	Mixed-Endo/Serous 3		M1043V (Hetero), H1047Y (Hetero)
E188	Endometrioid 2	R130fs*4, het
E19	Endometrioid 2	R130G, Het		K575fs*26
E191	Endometrioid 2		E545K (Hetero)						Q372fs*19
E192	Mixed-Endo/CC			I442_Y452del
E194	Endometrioid 2	L320STP, Het	R88Q (Hetero)
E195	Endometrioid 2	F37C, Het	H1047R	T576_D578del; R577_Q579del			S37C		R750*; D1258fs*29
E196	Endometrioid 2				F118L, Hetero				E992*
E197	Endometrioid 3							R280T, Homo
E198	Endometrioid 2	D24H, Het; A72T, Het	Q546P (Hetero)						G652W; G276fs*87
E199	Endometrioid 1			M582fs*19			Del (TTC, Hetero, 273g)		C1981fs*17
E2	Endometrioid 3							R282P, Hetero
E20	Endometrioid 1
E200	Endometrioid 2
E201	Endometrioid 2	R130G, Hetero			A36E, Hetero				F2141fs*59
E202	Endometrioid 2	Y16fs*28, het	R88Q (Hetero)						Q1894*
E203	Endometrioid 2	R130Q, Homo
E204	Endometrioid 2		H1047L (Hetero)						P224fs*8; Q2176fs*48
E205	Mixed-Endo/Serous		G118D (Hetero)						P1898fs*25
E206	Endometrioid 2		E545K (Hetero)
E207	Endometrioid 3		H1047L (Hetero)						Q2188*; S2079fs*56
E208	Endometrioid 3	K197fs*2, het
E209	Endometrioid 2	R130Q, Hetero	H1047?						E1542*
E21	Endometrioid 1						S37F, Hetero
E210	Endometrioid 1,2	K183fs*7, het		F69L, Hetero
E211	Endometrioid 2							Del (CT, Hetero, 948)
E213	Mixed-Endo/CC 3	R142W, Hetero	R88Q (Hetero)	D548Q, Hetero/ G353R, Hetero
E214	Endometrioid 2
E215	Endometrioid 2	R130G, Hetero	R88Q (Hetero)V344M (Hetero)						G671*
E216	Endometrioid 1,2								S1465F
E217	Endometrioid 3		R88Q (Homo)F909L (Hetero)	R503W, Hetero/ R348STP, Hetero				R213STP, Homo	S1338F
E218	Endometrioid 2	T319fs*6, het	C420R						R1046fs*15
E219	Endometrioid 1	N184fs*6, het	E545K (Hetero)						N1800fs*7; L1694fs*4
E22	Endometrioid 1	R233STP, Het; S33C, Het					S33C, Hetero
E220	Endometrioid 3		E545K					R273C, Homo
E221	Endometrioid 2			R639P,Hetero
E222	Endometrioid 2
E223	Endometrioid 1	R130Q, Hetero						R337H, Hetero
E224	Endometrioid 1	T319fs*6, het		I571>I					Q404*
E225	Endometrioid 1
E226	Endometrioid 1	R130G Hetero/ Q219STP, Hetero	R88Q (Hetero)	T576del; T576del					C2052fs*47
E227	Endometrioid 1			D549fs			G34V
E228	Endometrioid 2						S45A
E229	Endometrioid 2	A34T, Hetero; E288fs*9	E545K (Hetero)					R213STP, Hetero	L1694fs*4
E23	Endometrioid 1
E230	Endometrioid 2
E231	Endometrioid 2	K330fs*14, het					D32N		L231fs*1
E232	Endometrioid 2	R233STP, Hetero	R88Q (Hetero)H665Q (Hetero)R916C (Hetero)C378R (Hetero)		A533V, Hetero/ S273C, Hetero				R1551C; R1722*
E233	Mixed-Endo/Serous 3	I67K, Hetero/ R130Q, Hetero	R88Q (Hetero) R357Q (Hetero)		P323S, Hetero		T41A	R342STP, Hetero	R1989*; Q449H; P1575S
E234	Endometrioid 3
E235	Endometrioid 2								G778fs
E237	Endometrioid 3
E238	Endometrioid 3	N323fs*6, het; L146fs*1							D1850fs*33
E239	Endometrioid 2		Q546K (Hetero)
E24	Endometrioid 1	R130G, Het	K111N				S37F
E240	Mixed-Endo/Serous 3		E110K Y165H (Hetero) I406V (Hetero)				S37A; D32Y	Del (T, Hetero 693)	G276fs*87; P1175fs*5
E241	Endometrioid 1	R130Q, Hetero	E545A (Hetero)				D32Y; S37A		G276fs*87
E242	Endometrioid 2	D92V, Hetero	H1047L (Hetero)				D32Y
E243	Endometrioid 1	L318fs*2,					D32Y; G34V
E244	Endometrioid 1	R130Q, Hetero	R88Q (Hetero)						R1989*
E245	Endometrioid 2
E246	Endometrioid 1	R130G, Hetero/ Q245STP, Hetero	V146I (Hetero)H1047L (Hetero)				G34E
E247	Endometrioid 1						S37C
E248	Endometrioid 3
E249	Endometrioid 1	L318fs*2, homo; T319fs*2, homo; T319fs*2
E25	Mixed-Endo/Serous							S183STP, Homo
E250	Endometrioid 1		E545Q
E26	Endometrioid 2						SNP (T41I, Hetero+)
E27	Mixed-Endo/Serous
E28	Endometrioid 3			I82F, Hetero				M237I, Hetero
E29	Endometrioid 2	K13T, Het	R88Q (Hetero)M1043I (Hetero)	R724STP, Het					R1989*; R1202Q
E3	Endometrioid 3	F37C, Het	R88Q	I177N, Het			SNP (D32V, Hetero+)		P411L; P819L; R2158*
E34	Serous
E35	Mixed-Endo/Serous								A344D
E37	Serous							Y163H, Homo
E38	Endometrioid 1					E17K			G444fs*176
E39	Endometrioid 2		E545K
E4	Endometrioid 3	R15fs*29, homo	E110K						A167V; Q1420fs*60; R857fs*15
E40	Endometrioid 2
E41	Endometrioid 1	N323fs*2, het
E42	Endometrioid 2	F90fs*9, het; A126T, Het		N453del, het
E43	Endometrioid 2		E545K (Hetero)						R1026P; Q1399*
E49	clear cell							D281E, Hetero
E51	Endometrioid 2						D32G
E52	Serous (3)		V344M (Hetero)
E55	Endometrioid 1	S10fs*1, het	G364R (Hetero), E365K (Hetero)				SNP (T41I, Hetero+)		G89R; S1085*
E58	Endometrioid 2				N561D		S37C
E6	Endometrioid 3	P38S, Het; S59P, Het; C136R, Het	R88Q (Hetero)						R1446*; Q758fs*75
E60	Serous
E61	Endometrioid 2
E62	Endometrioid 2	N323fs*2, het	P471L (Hetero)	L449I
E63	Endometrioid 2
E64	Endometrioid 3	R233STP, Homo	Q546R/P (Hetero)
E65	Endometrioid 2	R130Q, Het	H1047R (Hetero)
E66	Endometrioid 2	I101fs*6, het							N1986fs*10
E67	Endometrioid 2	N323fs*2, het	H1047L						Q575fs*44
E68	Endometrioid 2							Y234C, Hetero
E69	Endometrioid 2								N2160fs*64
E7	Endometrioid 3	D24G, Het					SNP (T41I, Hetero+)		D1850fs*33; A1089fs*16
E70	Endometrioid 2		M1043V (Hetero)E365K (Hetero)
E71	Endometrioid 2			I566>I, het
E72	Endometrioid 2
E73	Endometrioid 2	R130fs*4, het	C420R				S37F, Hetero
E74	Endometrioid 2		G118D (Hetero)
E75	Mixed-Endo/Serous							F134L, Homo
E76	Endometrioid 2	R130G, Het	E545K (Hetero)				SNP (T41I, Hetero+)
E77	Endometrioid 3
E79	Mixed-Endo/Serous		E542V
E8	Endometrioid 3	R130G, Het		H450_E451del
E80	Endometrioid 2		E545K
E81	Endometrioid 2								S1149*; Q1519fs*8
E82	Endometrioid 2		E545K						Q1098*
E83	Endometrioid 3	R15fs*29, het; P204fs*17, het	E545K						Q1098*
E84	Endometrioid 2		E545K (Hetero)						P848fs*11
E85	Endometrioid 2	F271C, Homo		P568>ALIQLRKTRDQYLMKP					G1194fs*3
E86	Endometrioid 2	A3fs*4, het	H1047L (Hetero)
E87	Endometrioid 2	N22Y, Het; L146STP, Het		E443_Y452del>D, het				C135W, Homo	S258_261delfs*117
E88	Endometrioid 2	Q245fs*9, het; Y177fs*6	E545K
E89	Mixed-Endo/Serous	E7STP, Het; D162Y, Het	D300Y (Hetero) R818C (Hetero)	R557*, Het; I521M, Het; E458*, Het				L194F, Hetero
E9	Endometrioid 3	L181_A192delfs*9, het	G118D (Hetero)
E90	Endometrioid 2	Y225STP, Het	E545K/A (Hetero)
E91	Endometrioid 2	R15fs*29, het; R173C, Het K163T, Het; *404L; het	R88Q (Hetero), R93W (Hetero)	S608*, Het; E160*, Het					R1989*
E92	Endometrioid 2	F215fs*1, het; Q214H, Homo							L2016fs*14
E93	Endometrioid 2			K567E, Het					N2109fs*41
E94	Endometrioid 2
E95	Endometrioid 2	K267fs*9, het		L449del, het					Q1519fs*8
E96	Endometrioid 3	L318fs*1, het		E443_Y452del>D, het
E97	Endometrioid 3	Q17STP, Het	G118D (Hetero)D926N (Hetero)						M1564fs*1
E98	Endometrioid 2	K128del, het	E545A (Hetero)H1047R						M628fs*13
E99	Endometrioid 2					E17K	SNP (G34R, Hetero+)		exon8:c.2597_2597delG,
